# Supplementary material for: How Well Do HapMap Haplotypes Identify Common Haplotypes of Genes? A Comparison with Haplotypes of 334 Genes Resequenced in the Environmental Genome Project
Source: Oxford University Press journal article supplement (doi:10.1158/1055-9965.epi-05-0641), 2006-01-01
Supplement: 10559965epi050641-sup-cebp_1-06_taylor.doc [file 10559965epi050641-sup-cebp_1-06_taylor.doc]

Supplemental Table 1

| gene | # EGP common SNPs (MAF0.1) | # EGP rare SNPs (MAF <0.1) | # EGP haplotypes | # benchmark haplotypes (frequency 0.05) | # benchmark haplotypes assigned (of total 180) | # benchmark haplotypes observed as homozygote | # EGP common SNPs matched with HapMap | # EGP rare SNPs matched with HapMap |
| --- | --- | --- | --- | --- | --- | --- | --- | --- |
| ACTB | 17 | 58 | 21 | 5 | 156 | 2 | 2 | 0 |
| ADPRT | 58 | 119 | 18 | 6 | 155 | 2 | 11 | 3 |
| ADPRTL2 | 35 | 63 | 41 | 4 | 114 | 1 | 7 | 6 |
| ALAD | 11 | 39 | 30 | 6 | 110 | 3 | 2 | 3 |
| ALDH1A1 | 46 | 157 | 52 | 5 | 102 | 1 | 23 | 8 |
| APEX | 3 | 14 | 7 | 5 | 178 | 4 | 1 | 2 |
| API5 | 15 | 38 | 14 | 6 | 161 | 5 | 3 | 3 |
| APRT | 13 | 50 | 32 | 5 | 118 | 3 | 1 | 1 |
| ARNT | 24 | 108 | 17 | 5 | 150 | 2 | 5 | 14 |
| ARSA | 9 | 27 | 22 | 7 | 148 | 3 | 3 | 4 |
| ASNA1 | 1 | 47 | 2 | 2 | 180 | 2 | 1 | 9 |
| ATF3 | 14 | 61 | 18 | 6 | 147 | 4 | 4 | 2 |
| ATM | 67 | 325 | 46 | 4 | 84 | 1 | 16 | 32 |
| BAK1 | 17 | 37 | 17 | 5 | 147 | 5 | 1 | 1 |
| BAX | 13 | 30 | 15 | 4 | 153 | 4 | 3 | 1 |
| BCL2 | 49 | 142 | 149 | 0 | 0 | 0 | 23 | 28 |
| BID | 40 | 123 | 80 | 3 | 36 | 1 | 11 | 7 |
| BIK | 24 | 83 | 34 | 4 | 108 | 2 | 7 | 14 |
| BIRC3 | 13 | 91 | 14 | 6 | 155 | 4 | 0 | 0 |
| BIRC5 | 47 | 58 | 27 | 5 | 146 | 3 | 3 | 0 |
| BLVRA | 38 | 77 | 29 | 6 | 134 | 3 | 0 | 0 |
| BNIP1 | 23 | 85 | 18 | 5 | 137 | 3 | 4 | 3 |
| BNIP2 | 102 | 96 | 39 | 5 | 126 | 0 | 7 | 2 |
| BRCA1 | 117 | 181 | 35 | 5 | 120 | 1 | 23 | 12 |
| BRCA2 | 96 | 283 | 68 | 5 | 66 | 0 | 18 | 21 |
| BZRP | 22 | 45 | 33 | 5 | 127 | 2 | 8 | 0 |
| CAPN1 | 27 | 74 | 23 | 5 | 147 | 4 | 3 | 0 |
| CAPN6 | 9 | 80 | 5 | 3 | 176 | 3 | 1 | 0 |
| CAPNS1 | 8 | 79 | 28 | 8 | 102 | 2 | 0 | 0 |
| CASP2 | 1 | 66 | 2 | 2 | 180 | 2 | 0 | 7 |
| CASP3 | 41 | 85 | 40 | 6 | 105 | 1 | 2 | 5 |
| CASP6 | 16 | 97 | 23 | 4 | 120 | 4 | 2 | 2 |
| CASP9 | 82 | 88 | 26 | 3 | 145 | 0 | 6 | 3 |
| CCK | 19 | 49 | 32 | 6 | 114 | 4 | 1 | 0 |
| CCNA2 | 13 | 35 | 12 | 6 | 173 | 5 | 4 | 6 |
| CCNB1 | 23 | 21 | 11 | 4 | 168 | 3 | 3 | 0 |
| CCND1 | 3 | 15 | 5 | 4 | 177 | 4 | 1 | 0 |
| CCND2 | 43 | 115 | 100 | 1 | 18 | 1 | 17 | 48 |
| CCND3 | 12 | 29 | 14 | 7 | 168 | 4 | 3 | 0 |
| CCNE1 | 16 | 43 | 20 | 6 | 149 | 3 | 1 | 4 |
| CCNG1 | 12 | 45 | 23 | 5 | 135 | 3 | 0 | 0 |
| CCNG2 | 2 | 77 | 3 | 3 | 180 | 3 | 0 | 6 |
| CCNH | 2 | 89 | 3 | 2 | 174 | 2 | 1 | 15 |
| CCNI | 33 | 183 | 27 | 4 | 139 | 4 | 2 | 14 |
| CCNK | 17 | 122 | 11 | 4 | 163 | 4 | 5 | 8 |
| CDC14B | 25 | 186 | 36 | 6 | 105 | 1 | 5 | 5 |
| CDC16 | 48 | 201 | 22 | 6 | 144 | 2 | 0 | 0 |
| CDC2 | 43 | 60 | 23 | 5 | 157 | 2 | 8 | 2 |
| CDC23 | 17 | 66 | 8 | 3 | 166 | 3 | 0 | 0 |
| CDC25A | 18 | 67 | 13 | 7 | 157 | 5 | 3 | 7 |
| CDC25B | 24 | 70 | 33 | 6 | 107 | 2 | 1 | 0 |
| CDC25C | 20 | 63 | 17 | 4 | 139 | 4 | 3 | 3 |
| CDC27 | 42 | 143 | 20 | 7 | 159 | 1 | 9 | 5 |
| CDC2L5 | 59 | 165 | 31 | 7 | 143 | 3 | 0 | 0 |
| CDC34 | 44 | 143 | 21 | 5 | 135 | 2 | 2 | 2 |
| CDC42 | 31 | 210 | 15 | 5 | 153 | 5 | 3 | 8 |
| CDC45L | 29 | 154 | 46 | 6 | 103 | 4 | 6 | 4 |
| CDC5L | 26 | 189 | 24 | 2 | 127 | 1 | 6 | 7 |
| CDC6 | 3 | 42 | 4 | 2 | 177 | 2 | 2 | 9 |
| CDC7 | 35 | 129 | 27 | 5 | 131 | 1 | 7 | 8 |
| CDK2 | 2 | 29 | 3 | 3 | 180 | 3 | 2 | 8 |
| CDK3 | 10 | 29 | 8 | 4 | 176 | 4 | 2 | 0 |
| CDK4 | 5 | 32 | 4 | 4 | 180 | 4 | 2 | 10 |
| CDK5R1 | 2 | 15 | 3 | 2 | 173 | 2 | 1 | 0 |
| CDK6 | 28 | 108 | 53 | 5 | 94 | 3 | 7 | 15 |
| CDK9 | 5 | 20 | 3 | 3 | 180 | 3 | 4 | 7 |
| CDKL1 | 60 | 99 | 82 | 4 | 53 | 2 | 6 | 1 |
| CDKN1A | 21 | 27 | 42 | 5 | 88 | 3 | 2 | 1 |
| CDKN2A | 12 | 56 | 23 | 5 | 142 | 4 | 8 | 17 |
| CDKN2B | 17 | 46 | 20 | 5 | 142 | 3 | 9 | 13 |
| CDKN2C | 2 | 31 | 3 | 3 | 180 | 3 | 1 | 4 |
| CDKN2D | 3 | 10 | 4 | 2 | 178 | 2 | 1 | 0 |
| CDKN3 | 23 | 90 | 20 | 6 | 157 | 3 | 5 | 6 |
| CHC1L | 18 | 158 | 13 | 5 | 163 | 4 | 5 | 15 |
| CHEK1 | 24 | 64 | 19 | 6 | 157 | 3 | 5 | 7 |
| CHEK2 | 46 | 161 | 56 | 4 | 83 | 0 | 1 | 0 |
| CKN1 | 44 | 131 | 15 | 6 | 164 | 4 | 12 | 5 |
| CKS2 | 8 | 62 | 7 | 4 | 176 | 2 | 6 | 19 |
| CLU | 17 | 61 | 26 | 6 | 134 | 1 | 2 | 1 |
| COMT | 45 | 76 | 76 | 4 | 61 | 0 | 9 | 3 |
| CTNNB1 | 16 | 76 | 13 | 5 | 164 | 5 | 3 | 3 |
| CTNND1 | 19 | 72 | 7 | 4 | 168 | 3 | 5 | 5 |
| CYP1B1 | 18 | 40 | 23 | 4 | 131 | 3 | 4 | 1 |
| CYP27B1 | 2 | 16 | 3 | 2 | 174 | 2 | 0 | 2 |
| CYP2C19 | 24 | 78 | 11 | 5 | 168 | 5 | 0 | 0 |
| CYP2C8 | 50 | 116 | 20 | 8 | 152 | 2 | 6 | 4 |
| CYP2C9 | 25 | 155 | 12 | 5 | 152 | 4 | 3 | 13 |
| CYP2J2 | 35 | 145 | 20 | 6 | 137 | 0 | 7 | 7 |
| CYR61 | 11 | 19 | 21 | 7 | 148 | 3 | 4 | 0 |
| DAD1 | 63 | 112 | 25 | 5 | 138 | 2 | 3 | 3 |
| DAP | 61 | 99 | 45 | 5 | 101 | 1 | 9 | 2 |
| DCLRE1A | 7 | 86 | 9 | 5 | 172 | 3 | 0 | 0 |
| DDB2 | 19 | 57 | 23 | 7 | 156 | 2 | 3 | 2 |
| DDC | 95 | 224 | 53 | 4 | 87 | 0 | 7 | 10 |
| DIA1 | 71 | 109 | 80 | 3 | 39 | 0 | 13 | 3 |
| DMC1 | 9 | 92 | 12 | 4 | 162 | 3 | 3 | 8 |
| DNAJC3 | 24 | 184 | 21 | 5 | 120 | 2 | 1 | 1 |
| DNCH1 | 76 | 275 | 46 | 4 | 110 | 0 | 0 | 0 |
| DTR | 25 | 37 | 29 | 3 | 99 | 3 | 2 | 3 |
| E2F1 | 7 | 55 | 9 | 6 | 177 | 4 | 1 | 5 |
| E2F2 | 32 | 80 | 28 | 6 | 130 | 4 | 5 | 6 |
| E2F3 | 22 | 44 | 44 | 5 | 104 | 2 | 2 | 3 |
| E2F4 | 2 | 25 | 3 | 3 | 180 | 1 | 0 | 5 |
| E2F5 | 28 | 120 | 20 | 5 | 146 | 2 | 13 | 15 |
| EDN1 | 18 | 42 | 39 | 6 | 112 | 4 | 4 | 0 |
| EDN2 | 10 | 64 | 21 | 6 | 143 | 2 | 0 | 2 |
| EDN3 | 34 | 159 | 36 | 6 | 114 | 4 | 3 | 1 |
| EDNRA | 48 | 101 | 62 | 3 | 64 | 1 | 7 | 1 |
| EDNRB | 34 | 113 | 28 | 5 | 134 | 3 | 2 | 6 |
| EGF | 86 | 334 | 53 | 4 | 107 | 3 | 11 | 10 |
| EGFR | 117 | 432 | 157 | 0 | 0 | 0 | 0 | 0 |
| ELA1 | 35 | 85 | 18 | 5 | 148 | 2 | 0 | 0 |
| ELA2 | 10 | 33 | 20 | 7 | 146 | 3 | 0 | 0 |
| ERBB2 | 5 | 72 | 7 | 4 | 174 | 4 | 3 | 4 |
| ERCC1 | 27 | 46 | 37 | 5 | 124 | 2 | 5 | 3 |
| ERCC2 | 39 | 96 | 64 | 3 | 53 | 1 | 5 | 3 |
| ERCC3 | 23 | 111 | 15 | 5 | 165 | 3 | 6 | 14 |
| ERCC4 | 39 | 174 | 34 | 3 | 127 | 1 | 6 | 11 |
| ERCC5 | 40 | 136 | 55 | 4 | 64 | 1 | 5 | 11 |
| ERCC6 | 62 | 202 | 21 | 6 | 146 | 3 | 17 | 10 |
| ESR1 | 103 | 311 | 154 | 0 | 0 | 0 | 11 | 13 |
| ESRRG | 266 | 480 | 178 | 0 | 0 | 0 | 39 | 13 |
| EXO1 | 72 | 154 | 67 | 4 | 54 | 3 | 7 | 4 |
| FANCA | 126 | 380 | 58 | 4 | 74 | 0 | 0 | 0 |
| FANCC | 39 | 210 | 34 | 6 | 133 | 0 | 19 | 59 |
| FANCG | 7 | 31 | 8 | 5 | 171 | 4 | 0 | 0 |
| FAU | 2 | 14 | 2 | 2 | 180 | 2 | 1 | 2 |
| FEN1 | 2 | 14 | 2 | 2 | 180 | 2 | 0 | 4 |
| FGF1 | 60 | 212 | 151 | 0 | 0 | 0 | 0 | 0 |
| FGF10 | 56 | 172 | 28 | 6 | 136 | 1 | 0 | 0 |
| FGF11 | 8 | 9 | 10 | 4 | 159 | 4 | 3 | 1 |
| FGF13 | 10 | 72 | 14 | 8 | 159 | 8 | 0 | 0 |
| FGF17 | 11 | 44 | 40 | 5 | 77 | 1 | 1 | 1 |
| FGF20 | 35 | 127 | 35 | 6 | 126 | 4 | 0 | 0 |
| FGF22 | 21 | 50 | 42 | 3 | 91 | 1 | 0 | 0 |
| FGF23 | 16 | 69 | 19 | 6 | 152 | 5 | 2 | 1 |
| FGF6 | 27 | 73 | 39 | 6 | 117 | 4 | 0 | 0 |
| FGF8 | 1 | 26 | 2 | 2 | 180 | 2 | 0 | 3 |
| FGF9 | 40 | 101 | 33 | 4 | 121 | 2 | 12 | 1 |
| FGFR1 | 40 | 102 | 41 | 7 | 122 | 1 | 0 | 0 |
| FGFR3 | 21 | 111 | 31 | 4 | 117 | 2 | 0 | 2 |
| FOS | 9 | 29 | 22 | 5 | 135 | 5 | 1 | 2 |
| GAD2 | 68 | 254 | 37 | 3 | 130 | 3 | 6 | 11 |
| GADD45A | 9 | 23 | 17 | 5 | 155 | 3 | 2 | 0 |
| GADD45B | 9 | 19 | 23 | 8 | 141 | 5 | 0 | 1 |
| GADD45G | 12 | 24 | 24 | 5 | 131 | 4 | 1 | 6 |
| GCKR | 14 | 55 | 24 | 4 | 146 | 3 | 5 | 3 |
| GCLC | 51 | 148 | 62 | 5 | 60 | 3 | 0 | 1 |
| GCLM | 36 | 93 | 29 | 5 | 134 | 2 | 0 | 0 |
| GCSH | 21 | 117 | 17 | 2 | 149 | 1 | 2 | 1 |
| GLP1R | 69 | 121 | 104 | 2 | 24 | 0 | 6 | 2 |
| GPI | 11 | 73 | 9 | 5 | 172 | 5 | 4 | 7 |
| GPX1 | 4 | 13 | 6 | 3 | 168 | 2 | 0 | 1 |
| GPX2 | 14 | 37 | 12 | 5 | 154 | 4 | 0 | 0 |
| GPX3 | 39 | 47 | 33 | 4 | 133 | 2 | 5 | 1 |
| GPX4 | 16 | 17 | 24 | 5 | 132 | 2 | 0 | 0 |
| GSR | 39 | 164 | 53 | 5 | 95 | 1 | 5 | 5 |
| GSTP1 | 16 | 21 | 19 | 5 | 155 | 4 | 2 | 1 |
| GSTZ1 | 20 | 60 | 37 | 5 | 117 | 2 | 5 | 2 |
| GTF2H3 | 24 | 111 | 19 | 4 | 140 | 1 | 3 | 0 |
| GTF2H4 | 20 | 28 | 4 | 4 | 180 | 3 | 2 | 0 |
| HCNP | 29 | 63 | 20 | 6 | 149 | 3 | 3 | 1 |
| HGF | 22 | 185 | 26 | 4 | 145 | 2 | 1 | 14 |
| HMOX2 | 23 | 105 | 18 | 3 | 149 | 2 | 0 | 0 |
| HPRT1 | 19 | 103 | 21 | 6 | 132 | 1 | 0 | 0 |
| HSD17B2 | 42 | 220 | 46 | 4 | 105 | 3 | 9 | 13 |
| HSD17B3 | 65 | 90 | 116 | 1 | 9 | 0 | 14 | 6 |
| HSPB2 | 2 | 14 | 3 | 3 | 180 | 3 | 1 | 1 |
| HSU24186 | 3 | 14 | 4 | 2 | 173 | 2 | 1 | 5 |
| HTATIP | 13 | 27 | 14 | 5 | 161 | 4 | 3 | 1 |
| HUS1 | 51 | 96 | 12 | 6 | 162 | 3 | 3 | 2 |
| IGF1 | 23 | 110 | 32 | 6 | 115 | 2 | 5 | 9 |
| IGF2R | 85 | 274 | 121 | 2 | 20 | 0 | 12 | 12 |
| IGFBP1 | 8 | 55 | 7 | 3 | 166 | 3 | 2 | 1 |
| IGFBP2 | 17 | 145 | 62 | 5 | 58 | 1 | 2 | 12 |
| IGFBP4 | 8 | 45 | 16 | 5 | 148 | 3 | 5 | 0 |
| IGFBP5 | 21 | 112 | 82 | 2 | 37 | 1 | 7 | 4 |
| IGFBP6 | 7 | 33 | 13 | 6 | 163 | 4 | 1 | 0 |
| IGFBP7 | 62 | 109 | 106 | 1 | 9 | 0 | 5 | 2 |
| ITM2B | 7 | 71 | 8 | 5 | 170 | 3 | 2 | 2 |
| JUN | 4 | 32 | 8 | 5 | 177 | 4 | 0 | 1 |
| JUNB | 1 | 17 | 2 | 2 | 180 | 2 | 0 | 0 |
| LIG1 | 106 | 128 | 41 | 5 | 133 | 0 | 11 | 4 |
| LIG3 | 8 | 76 | 11 | 6 | 167 | 3 | 3 | 6 |
| LIG4 | 6 | 43 | 11 | 4 | 171 | 2 | 0 | 7 |
| LIPF | 27 | 71 | 18 | 5 | 161 | 3 | 0 | 0 |
| LPO | 12 | 159 | 16 | 5 | 160 | 4 | 3 | 9 |
| LTA | 10 | 13 | 14 | 5 | 161 | 5 | 1 | 0 |
| LTB | 2 | 21 | 3 | 3 | 180 | 3 | 0 | 0 |
| MBD4 | 17 | 51 | 8 | 5 | 170 | 5 | 3 | 4 |
| MCM2 | 9 | 104 | 10 | 6 | 175 | 5 | 0 | 0 |
| MCM3 | 51 | 111 | 31 | 7 | 134 | 2 | 0 | 0 |
| MCM3AP | 89 | 190 | 70 | 4 | 47 | 0 | 0 | 0 |
| MCM4 | 4 | 79 | 7 | 2 | 168 | 2 | 0 | 0 |
| MCM5 | 33 | 118 | 43 | 4 | 90 | 1 | 16 | 25 |
| MCM6 | 36 | 168 | 27 | 4 | 128 | 3 | 5 | 16 |
| MDM2 | 33 | 134 | 31 | 6 | 127 | 3 | 0 | 12 |
| MDM4 | 35 | 61 | 12 | 6 | 171 | 3 | 3 | 6 |
| MGST1 | 51 | 89 | 73 | 4 | 55 | 3 | 5 | 3 |
| MGST2 | 51 | 104 | 109 | 0 | 0 | 0 | 6 | 3 |
| MGST3 | 57 | 108 | 76 | 2 | 47 | 1 | 6 | 1 |
| MLH1 | 15 | 72 | 12 | 5 | 164 | 5 | 1 | 8 |
| MLL | 13 | 138 | 16 | 4 | 161 | 3 | 4 | 10 |
| MLP | 0 | 16 | 0 | 0 | 0 | 0 | 0 | 2 |
| MMP1 | 26 | 69 | 77 | 2 | 22 | 2 | 4 | 0 |
| MMP10 | 15 | 74 | 12 | 7 | 169 | 6 | 0 | 0 |
| MMP13 | 16 | 73 | 12 | 5 | 166 | 4 | 0 | 0 |
| MMP14 | 28 | 94 | 82 | 2 | 31 | 0 | 0 | 0 |
| MMP19 | 4 | 24 | 6 | 5 | 178 | 5 | 0 | 0 |
| MMP2 | 69 | 155 | 72 | 4 | 57 | 0 | 0 | 0 |
| MMP20 | 93 | 122 | 77 | 4 | 50 | 0 | 9 | 1 |
| MMP7 | 29 | 69 | 42 | 5 | 91 | 0 | 1 | 0 |
| MNAT1 | 49 | 242 | 40 | 5 | 106 | 0 | 18 | 32 |
| MPG | 28 | 53 | 51 | 3 | 95 | 2 | 4 | 2 |
| MRE11A | 60 | 219 | 27 | 5 | 134 | 0 | 12 | 7 |
| MSH2 | 61 | 233 | 40 | 6 | 117 | 1 | 0 | 0 |
| MSH3 | 197 | 294 | 82 | 4 | 50 | 0 | 36 | 17 |
| MSH4 | 100 | 185 | 32 | 5 | 127 | 2 | 16 | 11 |
| MSH6 | 32 | 131 | 48 | 4 | 92 | 2 | 9 | 9 |
| MUC1 | 3 | 18 | 4 | 3 | 173 | 3 | 1 | 2 |
| MUTYH | 6 | 30 | 10 | 4 | 167 | 4 | 1 | 3 |
| MYBPC3 | 33 | 101 | 43 | 6 | 117 | 1 | 4 | 0 |
| MYC | 5 | 39 | 6 | 4 | 176 | 4 | 3 | 6 |
| NBS1 | 58 | 190 | 48 | 5 | 94 | 2 | 28 | 15 |
| NEIL1 | 3 | 34 | 4 | 3 | 174 | 2 | 2 | 2 |
| NEIL2 | 59 | 162 | 52 | 6 | 97 | 2 | 2 | 8 |
| NF1 | 109 | 495 | 35 | 5 | 122 | 1 | 3 | 0 |
| NFKB1 | 51 | 172 | 51 | 4 | 105 | 0 | 10 | 9 |
| NOS1 | 109 | 301 | 116 | 2 | 32 | 0 | 12 | 11 |
| NR3C1 | 33 | 127 | 28 | 6 | 144 | 1 | 8 | 9 |
| NRAS | 3 | 40 | 4 | 4 | 180 | 3 | 2 | 5 |
| NTHL1 | 5 | 32 | 11 | 3 | 151 | 2 | 1 | 2 |
| OGG1 | 7 | 26 | 14 | 4 | 149 | 4 | 2 | 2 |
| OPRM1 | 27 | 97 | 29 | 5 | 121 | 1 | 0 | 0 |
| ORC2L | 20 | 133 | 8 | 3 | 167 | 3 | 8 | 11 |
| ORC4L | 41 | 126 | 14 | 7 | 160 | 2 | 0 | 0 |
| PAWR | 25 | 110 | 14 | 6 | 165 | 4 | 2 | 4 |
| PAX1 | 2 | 42 | 3 | 2 | 175 | 2 | 0 | 0 |
| PCNA | 19 | 25 | 14 | 4 | 169 | 4 | 3 | 0 |
| PGR | 74 | 170 | 32 | 6 | 141 | 1 | 15 | 4 |
| PKLR | 11 | 38 | 9 | 3 | 166 | 3 | 3 | 1 |
| PKM2 | 10 | 94 | 9 | 4 | 168 | 2 | 2 | 4 |
| PKMYT1 | 4 | 44 | 8 | 4 | 168 | 3 | 1 | 4 |
| PLA2G1B | 6 | 27 | 8 | 5 | 177 | 5 | 2 | 1 |
| PLA2G2A | 15 | 53 | 41 | 5 | 83 | 2 | 3 | 1 |
| PLA2G4A | 102 | 243 | 127 | 0 | 0 | 0 | 19 | 11 |
| PLA2G4C | 78 | 176 | 144 | 0 | 0 | 0 | 9 | 7 |
| PLA2G5 | 62 | 111 | 50 | 7 | 108 | 1 | 6 | 5 |
| PLA2G6 | 58 | 205 | 46 | 3 | 98 | 2 | 14 | 11 |
| PLK3 | 7 | 44 | 4 | 3 | 179 | 3 | 0 | 0 |
| PMS1 | 56 | 307 | 44 | 2 | 103 | 1 | 20 | 23 |
| PNKP | 7 | 43 | 11 | 6 | 169 | 3 | 1 | 2 |
| POLA | 26 | 243 | 22 | 5 | 131 | 3 | 10 | 63 |
| POLB | 23 | 92 | 20 | 4 | 147 | 1 | 9 | 4 |
| POLD1 | 21 | 206 | 18 | 6 | 161 | 4 | 7 | 12 |
| POLD2 | 14 | 39 | 16 | 5 | 154 | 4 | 2 | 2 |
| POLE | 109 | 286 | 33 | 5 | 116 | 2 | 4 | 11 |
| POLG | 27 | 80 | 34 | 3 | 106 | 3 | 7 | 4 |
| POLH | 7 | 89 | 6 | 4 | 178 | 2 | 2 | 10 |
| POLI | 73 | 107 | 27 | 5 | 146 | 3 | 33 | 22 |
| POLK | 31 | 178 | 21 | 6 | 147 | 2 | 7 | 13 |
| POLL | 14 | 14 | 6 | 4 | 173 | 3 | 3 | 4 |
| PPARD | 22 | 140 | 24 | 3 | 132 | 1 | 6 | 11 |
| PPIA | 17 | 56 | 15 | 5 | 158 | 5 | 0 | 0 |
| PPID | 17 | 82 | 18 | 3 | 149 | 3 | 0 | 0 |
| PRKDC | 28 | 271 | 30 | 5 | 97 | 3 | 13 | 51 |
| PRKR | 7 | 118 | 16 | 6 | 154 | 3 | 2 | 18 |
| PTCH2 | 21 | 64 | 27 | 4 | 135 | 0 | 5 | 2 |
| PTGS2 | 13 | 84 | 12 | 5 | 159 | 5 | 1 | 4 |
| RAD17 | 39 | 109 | 13 | 7 | 173 | 2 | 0 | 0 |
| RAD21 | 50 | 131 | 42 | 5 | 106 | 0 | 16 | 5 |
| RAD23B | 34 | 139 | 16 | 6 | 152 | 5 | 8 | 8 |
| RAD52 | 43 | 127 | 41 | 4 | 93 | 0 | 4 | 6 |
| RAD9A | 9 | 55 | 6 | 4 | 177 | 4 | 1 | 2 |
| RAF1 | 31 | 110 | 19 | 5 | 140 | 2 | 4 | 6 |
| RAG1 | 4 | 60 | 4 | 4 | 180 | 4 | 4 | 7 |
| RB1 | 38 | 237 | 39 | 3 | 107 | 3 | 16 | 32 |
| REQ | 2 | 43 | 4 | 3 | 178 | 3 | 1 | 4 |
| REV3L | 64 | 312 | 30 | 4 | 116 | 0 | 0 | 0 |
| RFC1 | 66 | 247 | 52 | 6 | 100 | 1 | 0 | 0 |
| RFC2 | 4 | 63 | 5 | 4 | 178 | 4 | 0 | 11 |
| RFC4 | 22 | 62 | 13 | 5 | 161 | 5 | 5 | 3 |
| RFC5 | 36 | 87 | 48 | 5 | 67 | 0 | 3 | 1 |
| RPA1 | 85 | 186 | 97 | 4 | 41 | 0 | 0 | 0 |
| RPS3 | 8 | 40 | 8 | 5 | 171 | 5 | 0 | 0 |
| SEI1 | 3 | 17 | 3 | 3 | 180 | 3 | 1 | 0 |
| SHH | 7 | 54 | 17 | 5 | 126 | 2 | 1 | 2 |
| SMUG1 | 12 | 22 | 12 | 5 | 160 | 3 | 5 | 7 |
| SNN | 32 | 83 | 18 | 4 | 154 | 2 | 4 | 3 |
| SOD1 | 15 | 65 | 13 | 4 | 159 | 3 | 0 | 0 |
| SOD2 | 29 | 64 | 16 | 3 | 147 | 3 | 2 | 1 |
| SOD3 | 12 | 60 | 23 | 7 | 150 | 4 | 1 | 0 |
| SPRR1A | 25 | 35 | 10 | 4 | 165 | 4 | 0 | 0 |
| SPRR1B | 43 | 32 | 17 | 3 | 154 | 2 | 0 | 0 |
| SRD5A1 | 62 | 134 | 41 | 5 | 113 | 1 | 6 | 1 |
| STAT2 | 9 | 52 | 9 | 3 | 169 | 2 | 3 | 7 |
| STE | 29 | 83 | 28 | 6 | 115 | 3 | 4 | 1 |
| TAF11 | 14 | 37 | 13 | 5 | 165 | 5 | 3 | 2 |
| TAF12 | 5 | 40 | 5 | 4 | 178 | 3 | 1 | 5 |
| TAF15 | 23 | 80 | 14 | 5 | 159 | 4 | 3 | 8 |
| TAF1C | 36 | 74 | 55 | 4 | 105 | 4 | 2 | 6 |
| TAF9 | 4 | 26 | 7 | 5 | 177 | 5 | 1 | 3 |
| TDG | 41 | 103 | 23 | 8 | 154 | 3 | 12 | 35 |
| TFDP1 | 16 | 134 | 19 | 2 | 139 | 2 | 4 | 2 |
| TFDP2 | 22 | 147 | 33 | 3 | 118 | 2 | 2 | 7 |
| TGFB2 | 28 | 122 | 84 | 2 | 27 | 1 | 8 | 3 |
| TGFB3 | 23 | 61 | 34 | 4 | 129 | 2 | 8 | 4 |
| TGFBR1 | 21 | 94 | 15 | 5 | 154 | 3 | 10 | 2 |
| TGFBR2 | 54 | 129 | 147 | 0 | 0 | 0 | 12 | 4 |
| TGFBR3 | 190 | 295 | 146 | 0 | 0 | 0 | 2 | 0 |
| TNF | 4 | 40 | 4 | 4 | 180 | 3 | 0 | 1 |
| TNFRSF11B | 84 | 161 | 39 | 4 | 106 | 1 | 32 | 11 |
| TNFRSF14 | 13 | 49 | 15 | 4 | 153 | 3 | 2 | 2 |
| TNFRSF17 | 17 | 40 | 11 | 8 | 169 | 4 | 1 | 2 |
| TNFRSF1B | 39 | 156 | 85 | 0 | 0 | 0 | 6 | 7 |
| TNFRSF5 | 13 | 59 | 14 | 7 | 162 | 3 | 2 | 4 |
| TNFRSF6 | 71 | 121 | 39 | 5 | 117 | 1 | 11 | 6 |
| TNFRSF7 | 24 | 35 | 73 | 2 | 18 | 0 | 4 | 0 |
| TNFRSF8 | 50 | 212 | 149 | 0 | 0 | 0 | 5 | 6 |
| TNFRSF9 | 31 | 94 | 28 | 5 | 144 | 4 | 6 | 4 |
| TP53 | 31 | 93 | 40 | 5 | 108 | 3 | 0 | 0 |
| TREX1 | 3 | 23 | 5 | 3 | 173 | 2 | 1 | 2 |
| TXN | 33 | 65 | 70 | 3 | 35 | 1 | 18 | 21 |
| UHRF1 | 65 | 145 | 77 | 3 | 40 | 1 | 0 | 0 |
| UMPS | 42 | 57 | 13 | 5 | 166 | 3 | 0 | 0 |
| UNG | 11 | 74 | 18 | 6 | 143 | 1 | 4 | 25 |
| VDR | 44 | 149 | 129 | 0 | 0 | 0 | 7 | 0 |
| WRN | 84 | 289 | 67 | 4 | 66 | 0 | 16 | 9 |
| WT1 | 66 | 156 | 42 | 2 | 97 | 2 | 8 | 1 |
| XPA | 50 | 88 | 18 | 7 | 166 | 1 | 26 | 31 |
| XPC | 33 | 111 | 24 | 7 | 143 | 6 | 4 | 5 |
| XRCC1 | 69 | 149 | 25 | 7 | 146 | 0 | 7 | 6 |
| XRCC2 | 44 | 154 | 13 | 4 | 151 | 2 | 4 | 5 |
| XRCC3 | 24 | 100 | 25 | 6 | 143 | 4 | 6 | 5 |
| ZFP36 | 2 | 23 | 3 | 3 | 180 | 3 | 0 | 0 |
| total | 10780 | 34463 | 10640 | 1459 | 43038 | 798 | 1573 | 1827 |
